# Supplementary material for: Hepatitis C virus leaves an epigenetic signature post cure of infection by direct-acting antivirals
Source: PubMed Central journal article supplement (PMC6602261; doi:10.1371/journal.pgen.1008181), 2019-06-19

# Supplementary Figure 1

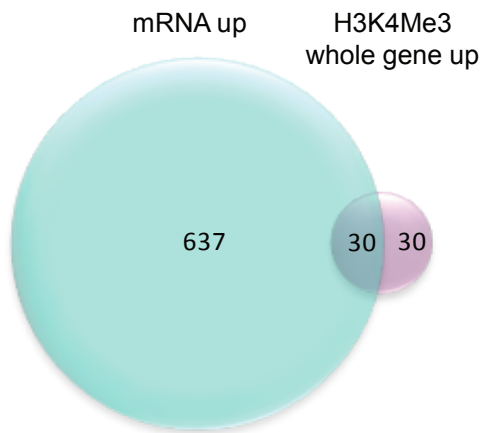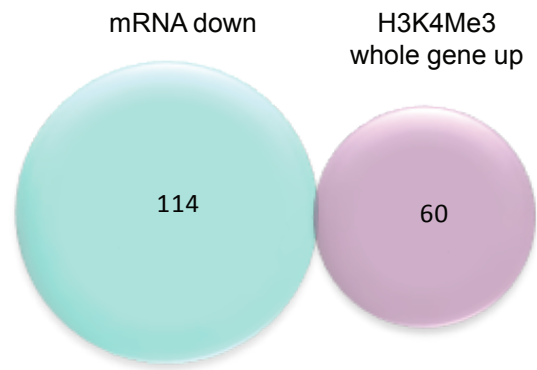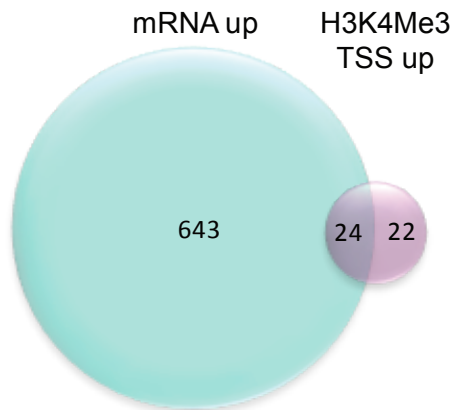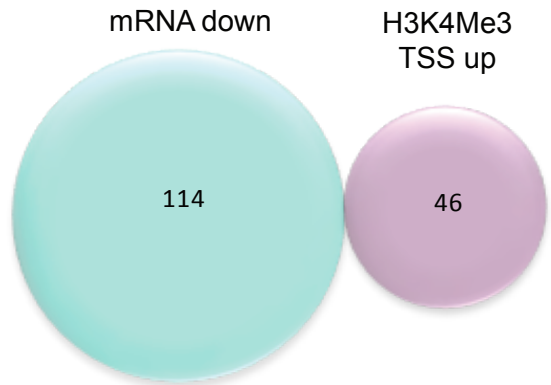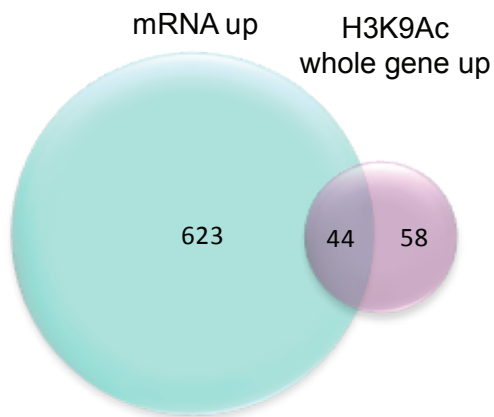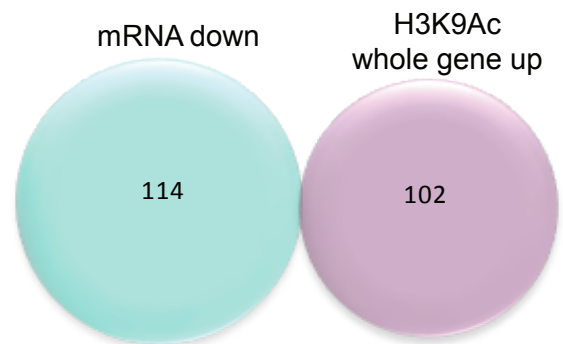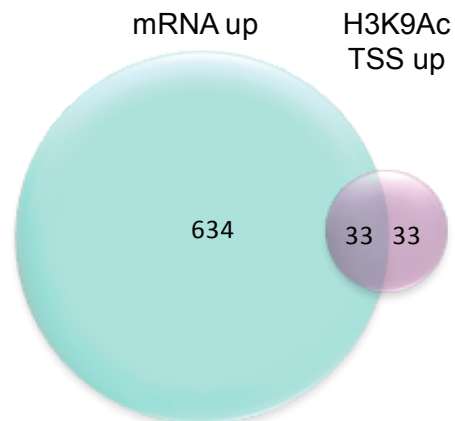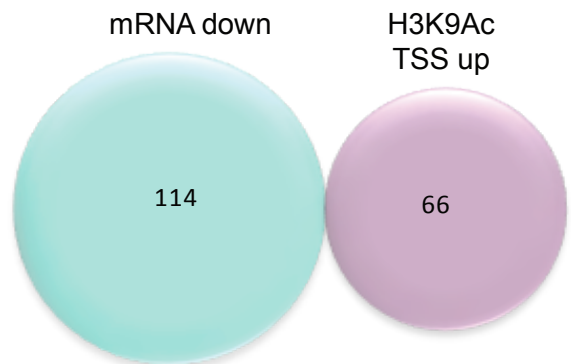

Supplement: pgen.1008181.s001.pdf [file pgen.1008181.s001.pdf]
