# Supplementary material for: Hepatitis C virus leaves an epigenetic signature post cure of infection by direct-acting antivirals
Source: PubMed Central journal article supplement (PMC6602261; doi:10.1371/journal.pgen.1008181), 2019-06-19
Supplement: pgen.1008181.s011.pdf [file pgen.1008181.s011.pdf]

**Supplementary Table 1.** Integration of changes in histone mark H3K4Me3 (ChIP-Seq) and mRNA expression (RNA-Seq) in HCV infected compared to non-infected cells

| <i>Gene Name</i> | <i>Hg19 location</i>   | <i>TSS_K4Me3 log2 fold change</i> | <i>TSS_K4Me3 adjusted P. value</i> | <i>mRNA log2 fold change</i> | <i>mRNA adjusted P. value</i> | <i>Gene Ontology*</i>                                                                                                                                     |
|------------------|------------------------|-----------------------------------|------------------------------------|------------------------------|-------------------------------|-----------------------------------------------------------------------------------------------------------------------------------------------------------|
| <b>DDX60</b>     | 4:169239000-169240000  | 0.52                              | 0.0458728                          | 5.54                         | 3.60E-92                      | Induce interferon and gene expression in response to viral infection.                                                                                     |
| <b>CEBPD</b>     | 8:48649000-48650000    | 0.41                              | 0.0209813                          | 3.32                         | 2.70E-91                      | Cell differentiation, motility, growth arrest, proliferation, cell death, metabolism and immune responses                                                 |
| <b>WNT10A</b>    | 2:219762000-219763000  | 1.56                              | 0.0002341                          | 3.05                         | 0.0038363                     | Activation of Wnt/ $\beta$ -catenin signaling                                                                                                             |
| <b>KLF4</b>      | 9:110250000-110251000  | 1.68                              | 4.56E-15                           | 2.45                         | 9.65E-107                     | High expression level is associated with vascular invasion and poor survival                                                                              |
| <b>JUNB</b>      | 19:12902000-12903000   | 0.44                              | 0.0027387                          | 2.23                         | 2.87E-272                     | Cell Growth/Signal Transduction Related.                                                                                                                  |
| <b>EDN1</b>      | 6:12291000-12292000    | 2.17                              | 0.0068791                          | 2.20                         | 2.97E-159                     | Maintenance of vascular tone. Co-mitogenic activity, potentiating the effects of other growth factors such as PDGF.                                       |
| <b>PDGFB</b>     | 22:39639000-39640000   | 0.57                              | 1.67E-05                           | 2.17                         | 3.51E-72                      | Growth factor, regulation of embryonic development, cell proliferation, cell migration, survival and chemotaxis.                                          |
| <b>FOSL1</b>     | 11:65666000-65667000   | 0.8                               | 0.0120007                          | 1.7                          | 4.06E-13                      | Regulator of cell proliferation, differentiation, transformation, adhesion and migration.                                                                 |
| <b>DUSP1</b>     | 5:172195000-172196000  | 1.28                              | 0.00959                            | 1.46                         | 3.68E-224                     | Induced in oxidative/heat stress, negative regulation of cellular proliferation.                                                                          |
| <b>APOA1-AS</b>  | 11:116707000-116708000 | -0.6                              | 0.0143811                          | -0.75                        | 2.53E-20                      | The major protein component of high density lipoprotein (HDL) in plasma. The protein promotes cholesterol efflux from tissues to the liver for excretion. |
| <b>DLK1</b>      | 14:101194000-101195000 | -1                                | 0.0481319                          | -1.01                        | 7.36E-65                      | Notch signaling pathway, regulation of gene expression, cell differentiation and development.                                                             |
| <b>PCSK9</b>     | 1:55506000-55507000    | -0.6                              | 1.21E-08                           | -1.21                        | 8.23E-150                     | Liver development, regulation of receptor recycling and internalization, regulation of lipid metabolism, regulation of apoptosis.                         |

\*Gene Ontology-adjusted from GeneCards (<https://www.genecards.org/>)
