# Supplementary material for: Hepatitis C virus leaves an epigenetic signature post cure of infection by direct-acting antivirals
Source: PubMed Central journal article supplement (PMC6602261; doi:10.1371/journal.pgen.1008181), 2019-06-19
Supplement: pgen.1008181.s012.pdf [file pgen.1008181.s012.pdf]

**Supplementary Table 2.** Integration of changes in histone mark H3K9Ac (ChIP-Seq) and mRNA expression (RNA-Seq) in HCV infected compared to non-infected cells for specific genes

| <i>Gene Name</i> | <i>Hg19 location</i>  | <i>TSS_K9Ac log2 fold change</i> | <i>TSS_K9Ac adjusted P. value</i> | <i>mRNA log2 fold change</i> | <i>mRNA adjusted P. value</i> | <i>Gene Ontology*</i>                                                                                                            |
|------------------|-----------------------|----------------------------------|-----------------------------------|------------------------------|-------------------------------|----------------------------------------------------------------------------------------------------------------------------------|
| <b>CEBPD</b>     | 8:48649000-48650000   | 1.208                            | 1.05E-08                          | 3.32                         | 2.70E-91                      | Cell differentiation, motility, growth arrest, proliferation, cell death, metabolism and immune responses                        |
| <b>PCSK9</b>     | 1:55506000-55507000   | -1.12                            | 2.41E-18                          | -1.21                        | 8.23E-150                     | Liver development, regulation of receptor recycling and internalization, regulation of lipid metabolism, regulation of apoptosis |
| <b>FOSL2</b>     | 2:28613000-28614000   | 0.52                             | 0.04595246                        | 1.81                         | 6.31E-225                     | Regulator of cell proliferation, differentiation, transformation, adhesion and migration                                         |
| <b>KLF4</b>      | 9:110251000-110252000 | 1.03                             | 2.93E-10                          | 2.45                         | 9.65E-107                     | High expression level is associated with vascular invasion and poor survival                                                     |
| <b>PDGFB</b>     | 22:39639000-39640000  | 0.94                             | 2.30E-13                          | 2.17                         | 3.51E-72                      | Growth factor, regulation of embryonic development, cell proliferation, cell migration, survival and chemotaxis.                 |
| <b>WNT10A</b>    | 2:219761000-219762000 | 1.19                             | 9.54E-06                          | 3.05                         | 0.0038363                     | Activation of Wnt/ $\beta$ -catenin signaling                                                                                    |
| <b>NFKBIE</b>    | 6:44231000-44232000   | 1.09                             | 0.041                             | 1.16                         | 1.88E-37                      | Involved in inappropriate immune cell development and cell growth.                                                               |
| <b>GLI1</b>      | 12:57854000-57855000  | 1.13                             | 5.81E-06                          | 1.27                         | 1.45E-07                      | Transcription factor, regulates stem cell proliferation, cell cycle progression and Wnt/ $\beta$ -catenin signaling.             |
| <b>TNFAIP3</b>   | 6:138187000-138188000 | 0.8                              | 2.54E-05                          | 2.24                         | 0                             | Involved in the cytokine-mediated immune and inflammatory responses.                                                             |
| <b>MYCN</b>      | 2:16080000-16081000   | -0.78                            | 2.25E-09                          | -1.83                        | 1.51E-296                     | Transcription factor, regulates Notch Pathway, Apoptosis and Autophagy.                                                          |

\*Gene Ontology-adjusted from GeneCards (<https://www.genecards.org/>)
