# Supplementary material for: Hepatitis C virus leaves an epigenetic signature post cure of infection by direct-acting antivirals
Source: PubMed Central journal article supplement (PMC6602261; doi:10.1371/journal.pgen.1008181), 2019-06-19
Supplement: pgen.1008181.s014.pdf [file pgen.1008181.s014.pdf]

**Supplementary Table 4: Clinical and Pathological features of patients**

| <b>Biopsy No.</b> | <b>Sample ID</b>           | <b>Age</b> | <b>Sex</b> | <b>Cirrhosis yes/no</b> | <b>HCV infection/ SVR</b> | <b>Anti-HCV treatment</b>                  | <b>Time from treatment</b> |
|-------------------|----------------------------|------------|------------|-------------------------|---------------------------|--------------------------------------------|----------------------------|
| 1                 | RA-291                     | 56         | Male       | Yes                     | HCV                       | NA                                         | NA                         |
| 2                 | 1393542-9<br>Pre-treatment | 57         | Male       | Yes                     | HCV                       | NA                                         | NA                         |
| 3                 | RA-367                     | 74         | Male       | Yes                     | HCV                       | NA                                         | NA                         |
| 4                 | RA-374                     | 58         | Male       | No                      | HCV                       | NA                                         | NA                         |
| 5                 | RA-390                     | 57         | Male       | Yes                     | HCV                       | NA                                         | NA                         |
| 6                 | A-41                       | 66         | Female     | No                      | HCV                       | NA                                         | NA                         |
| 7                 | A-51                       | 59         | Female     | No                      | HCV                       | NA                                         | NA                         |
| 8                 | RA-312                     | 57         | Male       | No                      | SVR                       | Viekirax+Exviera<br>+Ribavirin<br>24 weeks | 15 months                  |
| 9                 | RA-323                     | 64         | Male       | Yes                     | SVR                       | Viekirax+Exviera<br>+Ribavirin<br>12 weeks | 24 months                  |
| 10                | A-42                       | 68         | Female     | No                      | SVR                       | Daclatasvir+<br>Asunaprevir<br>+BMS-791325 | 12<br>months               |
| 11                | A-52                       | 60         | Female     | No                      | SVR                       | Daclatasvir+<br>Asunaprevir                | 12 months                  |
| 12                | RA-171                     | 69         | Male       | Yes                     | NA                        | NA                                         | NA                         |
| 13                | RA-235                     | 68         | Male       | Yes                     | NA                        | NA                                         | NA                         |
| 14                | RA-359                     | 70         | Female     | Yes                     | NA                        | NA                                         | NA                         |
| 15                | RA-244                     | 75         | Female     | Yes                     | NA                        | NA                                         | NA                         |
| 16                | RA-301                     | 68         | Female     | No                      | NA                        | NA                                         | NA                         |
| 17                | RA-307                     | 72         | Male       | Yes                     | NA                        | NA                                         | NA                         |
