# Supplementary material for: Hepatitis C virus leaves an epigenetic signature post cure of infection by direct-acting antivirals
Source: PLoS Genet. 2019 Jun 19;15(6):e1008181. doi: 10.1371/journal.pgen.1008181 (PMC6602261; doi:10.1371/journal.pgen.1008181)
Supplement: S3 Table — (XLS) [file pgen.1008181.s013.xls]

## Sheet: Pathway Maps
Enrichment analysis report
Enrichment by Pathway Maps					Common				Unique for hcv K9Ac ChIP_TSS_K9AC_logFC				Unique for HCV_mRNA_27_6_2016_mRNA_logFC
#	Maps	Total	pValue	Min FDR	p-value	FDR	In Data	Network Objects from Active Data	p-value	FDR	In Data	Network Objects from Active Data	p-value	FDR	In Data	Network Objects from Active Data
1	Cytoskeleton remodeling_TGF, WNT and cytoskeletal remodeling	111	1.07454e-31	9.84282e-29	1.07454e-31	9.84282e-29	97	RHEB2, GRB2, H-Ras, Alpha-actinin, CRK, c-Raf-1, p21, SMAD2, LIMK1, Fibronectin, Dsh, Actin, Rac1, Shc, PPAR-beta(delta), IKK-alpha, PLAUR (uPAR), ERK2 (MAPK1), Collagen IV, MYLK1, c-Src, c-Myc, Axin, MLK3(MAP3K11), PI3K cat class IA, ROCK2, Destrin, c-Jun, Arp2/3, Plasmin, SOS, PAK1, MNK1, PLAU (UPA), Paxillin, 4E-BP1, p130CAS, ROCK, Nucleolin, Vinculin, TAB1, FAK1, p15, SMAD3, SP1, p53, PAI1, C…	1	1	0		0.998841	0.999399	3	eIF4E, ILK, PLAT (TPA)
2	Cytoskeleton remodeling_Cytoskeleton remodeling	102	7.22341e-24	3.30832e-21	7.22341e-24	3.30832e-21	84	TRIO, GRB2, H-Ras, Alpha-actinin, CRK, c-Raf-1, p21, LIMK1, Fibronectin, Rac1, Shc, eIF4G2, PLAUR (uPAR), ERK2 (MAPK1), Collagen IV, MYLK1, c-Src, c-Myc, MLK3(MAP3K11), PI3K cat class IA, ROCK2, Destrin, c-Jun, Arp2/3, Plasmin, SOS, PAK1, MNK1, MyHC, PLAU (UPA), Paxillin, 4E-BP1, p130CAS, ROCK, Nucleolin, PIPKI gamma, Vinculin, FAK1, SMAD3, PAI1, Cofilin, Casein kinase II, alpha chains, TGF-beta …	1	1	0		0.931879	0.999399	6	eIF4E, ILK, eIF4G3, PLAT (TPA), alpha-3/beta-1 integrin, alpha-11/beta-1 integrin
3	Transport_Clathrin-coated vesicle cycle	71	1.23004e-20	3.25167e-18	1.23004e-20	3.25167e-18	62	Myosin I, Rabaptin-5, SNAP-25, Rab-8, GCC2, Eps15, VTI1B, PICALM, Dynamin-2, Actin, RAB9P40, RABGEF1, Syntaxin 5, PLEKHA8 (FAPP2), VPS45A, BIN1 (Amphiphysin II), GDI2, HIP12, EEA1, Syntaxin 16, VAMP2, PI3K reg class III (p150), AP complex 1, VAMP8, GOS-28, VAMP4, ARF1, COPII, Myosin VI, RILP (Rab interacting lysosomal protein), Rab-9, PREB, VTI1A, Rab11-FIP1, AP complex 2, PI3K cat class III (Vps…	1	1	0		0.916258	0.999399	4	NSF, DAB2, Coatomer, Rab-11A
4	Development_TGF-beta receptor signaling	50	1.41994e-20	3.25167e-18	1.41994e-20	3.25167e-18	48	CBP, H-Ras, Sno-N, c-Raf-1, p21, SMAD2, Shc, IKK-alpha, TSC-22, SMURF1, SMURF2, SOS, Anaphase-promoting complex (APC), IKK-beta, APC/hCDH1 complex, TAB1, p15, SMAD3, SP1, ER81, Elk-1, PAI1, TGF-beta 1, ERK1/2, GADD45 beta, FKBP12, SMAD4, ErbB2, MEK2(MAP2K2), NF-kB, YY1, TAK1(MAP3K7), MEKK4(MAP3K4), MEK1(MAP2K1), Importin (karyopherin)-beta, SMAD7, TGF-beta receptor type II, Ski, XIAP, MEK3(MAP2K3…	1	1	0		0.993351	0.999399	1	MEK6(MAP2K6)
5	Cell cycle_Influence of Ras and Rho proteins on G1/S Transition	53	1.0016e-17	1.83493e-15	1.0016e-17	1.83493e-15	48	H-Ras, c-Raf-1, p21, Rac1, CDK4, Cyclin A2, DIA1, IKK-alpha, Tob1, SKP2, NF-kB p50/p65, p27KIP1, c-Myc, MLK3(MAP3K11), PI3K cat class IA, ROCK2, alpha-5/beta-1 integrin, PAK1, JNK1(MAPK8), STAT3, p70 S6 kinase1, Cyclin E, FAK1, ERK1/2, MLCP (reg), GSK3 beta, Rb protein, PI3K reg class IA, MEK2(MAP2K2), MDM2, CDC42, LIMK2, AKT(PKB), PDK (PDPK1), MLCK, MLCP (cat), MEK1(MAP2K1), RhoA, RelA (p65 NF-k…	1	1	0		0.995083	0.999399	1	GGTase-I
6	Immune response_IL-4 signaling pathway	94	1.59775e-16	2.43923e-14	1.59775e-16	2.43923e-14	71	RHEB2, GRB2, IRS-1, c-Raf-1, IKK (cat), PDE3A, STAT1, Rac1, IP3 receptor, BAD, Shc, JunD, IKK-alpha, CREB1, SHIP, ERK2 (MAPK1), NF-kB p50/p65, JAK2, mTORC2, c-Cbl, PKC-delta, IL-4R type II, c-Jun, mTORC1, p90RSK1, PAK1, Fra-2, STAT3, 4E-BP1, AP-1, p70 S6 kinase1, PKC, PLC-gamma, Bcl-2, JNK(MAPK8-10), Elk-1, mTOR, p38alpha (MAPK14), Tuberin, JAK1, c-Rel (NF-kB subunit), IRS-2, PDE3B, Tyk2, ERK1/2,…	1	1	0		0.894058	0.999399	6	JAK3, IL-2R gamma chain, STAT6, IL-4R type I, PKC-zeta, MEK6(MAP2K6)
7	Aberrant B-Raf signaling in melanoma progression	55	3.18283e-16	4.16496e-14	3.18283e-16	4.16496e-14	48	CBP, RHEB2, ROCK1, SRp55, p21, BAD, MAP2, POU3F2 (BRN2), ERK2 (MAPK1), Mcl-1, PDE5A, mTORC2, FOXM1, AMPK alpha subunit, p90RSK1, BMF, p90Rsk, ROCK, AFX1, LKB1, HES1, AKT3, Bcl-2, RhoE, JNK(MAPK8-10), Bim, mTOR, Rictor, Tuberin, AKT1, Raptor, ERK1/2, CDK1 (p34), MEK1/2, AKT(PKB), NOTCH1 (NICD), MEK1(MAP2K1), ITGB1, B-Raf, ITGB3, ITGA6, Nicastrin, FOXO3A, Kinase MYT1, Aurora-B, RKIP, SPRY2, RalA	0.116767	0.143917	1	gamma-Secretase complex	1	1	0
8	Neurogenesis_NGF/ TrkA MAPK-mediated signaling	105	7.96123e-16	9.11561e-14	7.96123e-16	9.11561e-14	76	SPHK1, ERK5 (MAPK7), CDK5, GRB2, c-Fos, APS, Fra-1, H-Ras, CrkL, EGR1, CRK, c-Raf-1, FRS2, p21, PKC-epsilon, IP3 receptor, Shc, CREB1, PLAUR (uPAR), M-Ras, RGS2, RUSC1 (NESCA), c-Src, GAB2, SHPS-1, NF-kB1 (p50), K-RAS, PKC-delta, c-Jun, SOS, SH2B, p90Rsk, p130CAS, AP-1, Calmodulin, NUR77, MAGI-2, PKC-lambda/iota, SHP-2, SORBS1, SP1, JMJD3, SHB, PDZ-GEF1, RIT, Elk-1, FosB, CDK5R1 (p35), ERK1/2, HB…	1	1	0		0.678827	0.999399	9	MEF2C, SGK1, RASGRF1, SAC, PKC-zeta, RAP-1A, MEK6(MAP2K6), p107, MATK
9	Signal transduction_mTORC1 downstream signaling	61	1.62087e-15	1.64968e-13	1.62087e-15	1.64968e-13	51	PDK1, SCD, IRS-1, PPAR-alpha, CBP80, Cytochrome c, TFEB, BAD, ACSL3, 4E-BP2, p27KIP1, PPAR-gamma, PDIP46, G6PD, HIF1A, MAF1, mTORC1, eEF2K, eIF4B, CAD, MVK, STAT3, 4E-BP1, RRN3, p70 S6 kinase1, MTHFD2, ATG13, p53, p70 S6 kinase2, GRB10, SC5D, Rictor, SREBP1 (nuclear), RPS6, ATF-4, VEGF-A, UBF, SIN1, ULK1, p70 S6 kinases, GSK3 beta, MDM2, CLIP170, YY1, eEF2, PDCD4, Cyclin D, SREBP2 (nuclear), ULK2…	1	1	0		0.220865	0.84497	8	eIF4E, SGK1, HMGCS2, LDHB, RNA polymerase I, LIPIN1, PFKP, RNA polymerase III
10	Development_WNT signaling pathway. Part 2	53	2.13497e-15	1.95563e-13	2.13497e-15	1.95563e-13	46	CBP, Bcl-9, CD44, Fra-1, Lef-1, DKK1, Casein kinase I epsilon, PYGO2, Vimentin, Dsh, Survivin, PPAR-beta(delta), NRSF, c-Myc, Axin, E-cadherin, c-Jun, ENC1, TAB1, SNAIL1, Casein kinase II, alpha chains, FRAT1, BMP4, APC protein, TCF7L2 (TCF4), BRG1, Beta-catenin, VEGF-A, Claudin-1, WIF1, NRCAM, GSK3 beta, LRP5, MESDC2, TAK1(MAP3K7), RUVBL1, RhoA, PYGO1, Tcf(Lef), NLK, WNT, CHIBBY, Cyclin D1, ITF2…	1	1	0		0.967511	0.999399	2	DAB2, PP2C alpha

## Sheet: GO Processes
Enrichment analysis report
Enrichment by GO Processes					Common				Unique for hcv K9Ac ChIP_TSS_K9AC_logFC				Unique for HCV_mRNA_27_6_2016_mRNA_logFC
#	Processes	Total	pValue	Min FDR	p-value	FDR	In Data	Network Objects from Active Data	p-value	FDR	In Data	Network Objects from Active Data	p-value	FDR	In Data	Network Objects from Active Data
1	metabolic process	12578	0	0	0	0	7398	KIAA0971, APG3, PQLC3, ZNF668, DNMT3B, KBTBD2, SDHA, RFC4, SIAT4A, ANKRD32, CRYM, ALK-4, ZNF703, dUTPase (DUT), TRIO, VDU1, SPHK1, VLDL, AMDHD1, BCKD-E1beta, SIAHBP1, TOM20, SCPX, RKHD3, PYROXD2, TR-alpha, Helios, YME1L1, PDK1, ARGLU1, Galectin-3, DERP6, SMYD2, ZNF501, TCF12, TBL1X, DHX34, PRDX3, MetAP-2, TIP30, GMEB1, TRIM56, Galpha(q)-specific Class A Orphan/other GPCRs, HOXA13, ZNF599, IKBZ, U…	0.000399528	0.0199849	74	TLK2, MPPED2, Elastase 3B, NAT12, FoxL2, NEP1, LONRF2, ZBTB42, DNAI1, ZNF431, HSD17B1, RPS28, Dynein, axonemal, intermediate chains, LIPE, ZDHHC24, CNBP, Thimet oligopeptidase, ZNF600, ZNF536, ARD1B, SRB7, ZNF417, TGT, BCL9-2, RFX4, ZNF616, Ubi-L, ZNF623, PAMCI, CPSF2, OBFC1, KIAA1443, Tim22, ECEL1, ZNF665, RPS20, Pen-2, ZNF141, ZNF71, Nek8, SERTAD1, NEU3, ONECUT3, ZNF284, ORMDL2, CKBBP2, Hepcidi…	0.00464836	0.0789813	1717	ZNF510, TULP4, ZNF135, Pappalysin-2, G0/G1switch 2, GLYATL1, PDE6A, ALDOB, ATP6V1A (70kD), MRPL34, BTBD18, APG16L1, SNAT, IL-7 receptor, FKBP9L, UQCRB, FOP, Meckelin, NSF, FR-alpha, KMO, CYP2C8, INO80C, G-protein gamma 13, FDX1L, PANK1, RAG1, TMEM39B, ZNF260, TDRD6, HOXA10, BNIPL, VHLL, MTND4, C4BP beta, GPX2, PFTAIRE-1, ASAH, HKLP2, ALPK3, CYP1B1, COL6A3, ACAP1(CENTB1), DNHD1, RDH12, GALNTL2, PA…
2	cellular metabolic process	10751	0	0	0	0	6624	KIAA0971, APG3, PQLC3, ZNF668, DNMT3B, KBTBD2, SDHA, RFC4, SIAT4A, ANKRD32, CRYM, ALK-4, ZNF703, dUTPase (DUT), TRIO, VDU1, SPHK1, VLDL, AMDHD1, BCKD-E1beta, SIAHBP1, TOM20, SCPX, RKHD3, TR-alpha, Helios, YME1L1, PDK1, ARGLU1, Galectin-3, DERP6, SMYD2, ZNF501, TCF12, TBL1X, DHX34, PRDX3, MetAP-2, TIP30, GMEB1, TRIM56, Galpha(q)-specific Class A Orphan/other GPCRs, HOXA13, ZNF599, IKBZ, UGT8, RNUT…	0.00570697	0.0969113	62	TLK2, NAT12, FoxL2, NEP1, ZBTB42, ZNF431, HSD17B1, RPS28, LIPE, CNBP, Thimet oligopeptidase, ZNF600, ZNF536, ARD1B, SRB7, ZNF417, TGT, BCL9-2, RFX4, ZNF616, Ubi-L, ZNF623, CPSF2, OBFC1, KIAA1443, Tim22, ZNF665, RPS20, Pen-2, ZNF141, ZNF71, Nek8, SERTAD1, NEU3, ONECUT3, ZNF284, ORMDL2, CKBBP2, E2N(UBC13), UCP2, HEXIM1, ZNF471, Ttc7b, PDE7A, MIER2, NF-E2 (45 kDa), eIF2B, Uronyl-2-sulfotransferase, …	0.344333	0.707593	1422	ZNF510, TULP4, ZNF135, Pappalysin-2, G0/G1switch 2, PDE6A, ALDOB, ATP6V1A (70kD), MRPL34, BTBD18, APG16L1, SNAT, IL-7 receptor, FKBP9L, UQCRB, FOP, Meckelin, NSF, FR-alpha, KMO, CYP2C8, INO80C, G-protein gamma 13, FDX1L, PANK1, RAG1, ZNF260, TDRD6, HOXA10, BNIPL, VHLL, MTND4, GPX2, PFTAIRE-1, ASAH, ALPK3, CYP1B1, RDH12, GALNTL2, PA2G6, RARbeta, GLUT2, CPSM, NCAG1, NCAM1, DHA2, UGT2A1, RNU7, TCF24…
3	cellular macromolecule metabolic process	8542	0	0	0	0	5410	KIAA0971, APG3, ZNF668, DNMT3B, KBTBD2, RFC4, SIAT4A, ANKRD32, ALK-4, ZNF703, dUTPase (DUT), TRIO, VDU1, SPHK1, VLDL, SIAHBP1, TOM20, RKHD3, TR-alpha, Helios, YME1L1, PDK1, ARGLU1, Galectin-3, DERP6, SMYD2, ZNF501, TCF12, TBL1X, DHX34, PRDX3, MetAP-2, TIP30, GMEB1, TRIM56, HOXA13, ZNF599, IKBZ, RNUT1, HDAC9, Sh3rf2, PPM1K, TEF-5, MRPS17, STAT5A, TSGA14, APA1, HAT1, TdIF1, HRPT2, MMS21, NKTR, CBP,…	0.000765722	0.0290925	55	TLK2, NAT12, FoxL2, NEP1, ZBTB42, ZNF431, RPS28, CNBP, ZNF600, ZNF536, ARD1B, SRB7, ZNF417, TGT, BCL9-2, RFX4, ZNF616, Ubi-L, ZNF623, CPSF2, OBFC1, KIAA1443, Tim22, ZNF665, RPS20, Pen-2, ZNF141, ZNF71, Nek8, SERTAD1, NEU3, ONECUT3, ZNF284, CKBBP2, E2N(UBC13), UCP2, HEXIM1, ZNF471, MIER2, NF-E2 (45 kDa), eIF2B, Uronyl-2-sulfotransferase, ZNF740, IRE1, eIF2B2, DRIL1, PRDM13, UBE2S, RPS19, RPS30, U5…	0.999985	1	1020	ZNF510, TULP4, ZNF135, Pappalysin-2, MRPL34, BTBD18, APG16L1, SNAT, IL-7 receptor, FKBP9L, FOP, Meckelin, NSF, FR-alpha, INO80C, RAG1, ZNF260, TDRD6, HOXA10, VHLL, GPX2, PFTAIRE-1, ALPK3, CYP1B1, GALNTL2, RARbeta, CPSM, NCAG1, NCAM1, RNU7, TCF24, alpha-4/beta-1 integrin, PROX2, S14 protein, RPA3, GALNT12, SPHAR, Calgranulin A, RecQ5, CaMK II beta, FGF17, Klotho beta, VRK2, Neuronatin, Casein kina…
4	organic substance metabolic process	11460	5e-299	1e-295	5e-299	1e-295	6819	KIAA0971, APG3, PQLC3, ZNF668, DNMT3B, KBTBD2, SDHA, RFC4, SIAT4A, ANKRD32, CRYM, ALK-4, ZNF703, dUTPase (DUT), TRIO, VDU1, SPHK1, VLDL, AMDHD1, BCKD-E1beta, SIAHBP1, TOM20, SCPX, RKHD3, TR-alpha, Helios, YME1L1, PDK1, ARGLU1, Galectin-3, DERP6, SMYD2, ZNF501, TCF12, TBL1X, DHX34, PRDX3, MetAP-2, TIP30, GMEB1, TRIM56, HOXA13, ZNF599, IKBZ, UGT8, RNUT1, Thymidylate kinase, HDAC9, Sh3rf2, PPM1K, TE…	0.00348997	0.080706	66	TLK2, Elastase 3B, NAT12, FoxL2, NEP1, LONRF2, ZBTB42, ZNF431, HSD17B1, RPS28, LIPE, CNBP, Thimet oligopeptidase, ZNF600, ZNF536, ARD1B, SRB7, ZNF417, TGT, BCL9-2, RFX4, ZNF616, Ubi-L, ZNF623, CPSF2, OBFC1, KIAA1443, Tim22, ECEL1, ZNF665, RPS20, Pen-2, ZNF141, ZNF71, Nek8, SERTAD1, NEU3, ONECUT3, ZNF284, ORMDL2, CKBBP2, Hepcidin, E2N(UBC13), UCP2, HEXIM1, ZNF471, Ttc7b, PDE7A, MIER2, NF-E2 (45 kD…	0.0771465	0.406952	1541	ZNF510, TULP4, ZNF135, Pappalysin-2, G0/G1switch 2, PDE6A, ALDOB, ATP6V1A (70kD), MRPL34, BTBD18, APG16L1, SNAT, IL-7 receptor, FKBP9L, UQCRB, FOP, Meckelin, NSF, FR-alpha, KMO, CYP2C8, INO80C, FDX1L, PANK1, RAG1, ZNF260, TDRD6, HOXA10, BNIPL, VHLL, MTND4, C4BP beta, GPX2, PFTAIRE-1, ASAH, ALPK3, CYP1B1, COL6A3, ACAP1(CENTB1), RDH12, GALNTL2, PA2G6, RARbeta, GLUT2, CPSM, NCAG1, NCAM1, DHA2, UGT2A…
5	primary metabolic process	11092	2e-298	8.31638e-295	2e-298	8.31638e-295	6643	KIAA0971, APG3, PQLC3, ZNF668, DNMT3B, KBTBD2, SDHA, RFC4, SIAT4A, ANKRD32, CRYM, ALK-4, ZNF703, dUTPase (DUT), TRIO, VDU1, SPHK1, VLDL, AMDHD1, BCKD-E1beta, SIAHBP1, TOM20, SCPX, RKHD3, TR-alpha, Helios, YME1L1, PDK1, ARGLU1, Galectin-3, DERP6, SMYD2, ZNF501, TCF12, TBL1X, DHX34, PRDX3, MetAP-2, TIP30, GMEB1, TRIM56, HOXA13, ZNF599, IKBZ, UGT8, RNUT1, Thymidylate kinase, HDAC9, Sh3rf2, PPM1K, TE…	0.00123195	0.0428153	66	TLK2, Elastase 3B, NAT12, FoxL2, NEP1, LONRF2, ZBTB42, ZNF431, HSD17B1, RPS28, LIPE, CNBP, Thimet oligopeptidase, ZNF600, ZNF536, ARD1B, SRB7, ZNF417, TGT, BCL9-2, RFX4, ZNF616, Ubi-L, ZNF623, CPSF2, OBFC1, KIAA1443, Tim22, ECEL1, ZNF665, RPS20, Pen-2, ZNF141, ZNF71, Nek8, SERTAD1, NEU3, ONECUT3, ZNF284, ORMDL2, CKBBP2, Hepcidin, E2N(UBC13), UCP2, HEXIM1, ZNF471, Ttc7b, PDE7A, MIER2, NF-E2 (45 kD…	0.494246	0.817213	1457	ZNF510, TULP4, ZNF135, Pappalysin-2, G0/G1switch 2, PDE6A, ALDOB, ATP6V1A (70kD), MRPL34, BTBD18, APG16L1, SNAT, IL-7 receptor, FKBP9L, UQCRB, FOP, Meckelin, NSF, FR-alpha, KMO, CYP2C8, INO80C, FDX1L, PANK1, RAG1, ZNF260, TDRD6, HOXA10, VHLL, MTND4, C4BP beta, GPX2, PFTAIRE-1, ASAH, ALPK3, CYP1B1, ACAP1(CENTB1), RDH12, GALNTL2, PA2G6, RARbeta, GLUT2, CPSM, NCAG1, NCAM1, DHA2, UGT2A1, RNU7, TCF24,…
6	macromolecule metabolic process	9479	6.59494e-254	1.52893e-250	6.59494e-254	1.52893e-250	5756	KIAA0971, APG3, ZNF668, DNMT3B, KBTBD2, RFC4, SIAT4A, ANKRD32, ALK-4, ZNF703, dUTPase (DUT), TRIO, VDU1, SPHK1, VLDL, SIAHBP1, TOM20, RKHD3, TR-alpha, Helios, YME1L1, PDK1, ARGLU1, Galectin-3, DERP6, SMYD2, ZNF501, TCF12, TBL1X, DHX34, PRDX3, MetAP-2, TIP30, GMEB1, TRIM56, HOXA13, ZNF599, IKBZ, RNUT1, HDAC9, Sh3rf2, PPM1K, TEF-5, MRPS17, STAT5A, DIAC, TSGA14, APA1, HAT1, TdIF1, HRPT2, MMS21, NKTR…	0.000503038	0.0231835	60	TLK2, Elastase 3B, NAT12, FoxL2, NEP1, LONRF2, ZBTB42, ZNF431, RPS28, CNBP, Thimet oligopeptidase, ZNF600, ZNF536, ARD1B, SRB7, ZNF417, TGT, BCL9-2, RFX4, ZNF616, Ubi-L, ZNF623, CPSF2, OBFC1, KIAA1443, Tim22, ECEL1, ZNF665, RPS20, Pen-2, ZNF141, ZNF71, Nek8, SERTAD1, NEU3, ONECUT3, ZNF284, CKBBP2, Hepcidin, E2N(UBC13), UCP2, HEXIM1, ZNF471, MIER2, NF-E2 (45 kDa), eIF2B, Uronyl-2-sulfotransferase,…	0.995336	1	1180	ZNF510, TULP4, ZNF135, Pappalysin-2, MRPL34, BTBD18, APG16L1, SNAT, IL-7 receptor, FKBP9L, FOP, Meckelin, NSF, FR-alpha, INO80C, RAG1, ZNF260, TDRD6, HOXA10, VHLL, C4BP beta, GPX2, PFTAIRE-1, ALPK3, CYP1B1, COL6A3, GALNTL2, RARbeta, CPSM, NCAG1, NCAM1, RNU7, TCF24, Isca1(Hbld2), alpha-4/beta-1 integrin, ADAM-TS16, PROX2, S14 protein, RPA3, GALNT12, SPHAR, Calgranulin A, RecQ5, CaMK II beta, FGF17…
7	cellular component organization or biogenesis	7037	4.07037e-224	8.0884e-221	4.07037e-224	8.0884e-221	4448	KIAA0971, APG3, DNMT3B, RFC4, ZNF703, dUTPase (DUT), TRIO, VDU1, VLDL, PARD6G, Tensin, Protocadherin LKC, TOM20, SCPX, YME1L1, PDK1, Galectin-3, DERP6, Laminin 9, SMYD2, Selenoprotein N, C19orf21, KIAA1043, TBL1X, PRDX3, CNTN1 (F3), H19, TIP30, HOXA13, LTBP3, UGT8, CROCCL1, RNUT1, HDAC9, CCDC100, MRPS17, Plakophilin 3, TSGA14, HAT1, Alpha-actinin 4, HRPT2, MMS21, CBP, MIP-T3, GPX3, LIPC (HL), Gli…	0.364182	0.648794	34	TLK2, FoxL2, NEP1, DNAI1, SLC17A7, RPS28, Dynein, axonemal, intermediate chains, LIPE, RILPL2, SPBC24, RFX4, Ubi-L, OBFC1, TMEM107, TGF-beta 3, Tim22, RPS20, Pen-2, CKBBP2, E2N(UBC13), Ttc7b, TMEM11, NF-E2 (45 kDa), PAHX-AP1, PRDM13, UBE2S, RPS19, RPS30, DNAH7, U5-15kD, gamma-Secretase complex, HDGFRP3, LINGO3, TLR2	0.0174295	0.174385	974	ZNF135, Nectin-4, ALDOB, HAUS7, SLITRK4, MRPL34, RAB39B, APG16L1, RPLP0-like, Laminin 5, IL-7 receptor, UQCRB, PIGR, BBS5, FOP, Meckelin, NSF, FR-alpha, INO80C, HBGA, NCAM2, C15orf38, RAG1, TMEM39B, VHLL, MTND4, HKLP2, CYP1B1, ZNF207, COL6A3, NCAM1, Telethonin, KIAA0376, ABR, HEPACAM2, Keratin 10, Isca1(Hbld2), FEZ2, LRRTM4, alpha-4/beta-1 integrin, RPA3, RecQ5, CaMK II beta, FGF17, Klotho beta, …
8	cellular nitrogen compound metabolic process	6555	7.47006e-217	1.29886e-213	7.47006e-217	1.29886e-213	4179	ZNF668, DNMT3B, RFC4, SIAT4A, ANKRD32, CRYM, ZNF703, dUTPase (DUT), SPHK1, AMDHD1, BCKD-E1beta, SIAHBP1, TR-alpha, Helios, ARGLU1, Galectin-3, DERP6, SMYD2, ZNF501, TCF12, TBL1X, DHX34, GMEB1, HOXA13, ZNF599, IKBZ, UGT8, RNUT1, Thymidylate kinase, HDAC9, PPM1K, TEF-5, MRPS17, STAT5A, KIAA1394, APA1, TdIF1, PLA2G4C, HRPT2, TPK1, MMS21, CBP, GPX3, LIPC (HL), IDH1, SLC19A2, SRA1, ZNF771, RIF1, TRAP2…	9.71909e-05	0.00818722	48	FoxL2, NEP1, ZBTB42, ZNF431, RPS28, CNBP, Thimet oligopeptidase, ZNF600, ZNF536, SRB7, ZNF417, BCL9-2, RFX4, ZNF616, Ubi-L, ZNF623, CPSF2, OBFC1, KIAA1443, ZNF665, RPS20, ZNF141, ZNF71, SERTAD1, NEU3, ONECUT3, ZNF284, ORMDL2, CKBBP2, E2N(UBC13), UCP2, HEXIM1, ZNF471, PDE7A, MIER2, NF-E2 (45 kDa), eIF2B, ZNF740, IRE1, eIF2B2, DRIL1, PRDM13, RPS19, RPS30, U5-15kD, gamma-Secretase complex, ZNF781, Z…	0.959426	1	821	ZNF510, ZNF135, PDE6A, ALDOB, ATP6V1A (70kD), MRPL34, APG16L1, SNAT, UQCRB, FR-alpha, KMO, INO80C, PANK1, RAG1, ZNF260, TDRD6, HOXA10, MTND4, GPX2, ASAH, CYP1B1, PA2G6, RARbeta, CPSM, RNU7, TCF24, ATP13A4, PROX2, S14 protein, RPA3, SPHAR, RecQ5, ATF-3, BRM, PGAM2, SMPD3, LMX1B, ZNF497, TEX15, GSTO1, DHFR, CECR1, A130042E20Rik, MTHFD2L, BRUNOL4, RBM21, MYT1, UBCH7, eIF4E, ZNF567, ZNF574, MEF2C, BA…
9	nitrogen compound metabolic process	6998	3.63709e-216	5.62133e-213	3.63709e-216	5.62133e-213	4408	ZNF668, DNMT3B, RFC4, SIAT4A, ANKRD32, CRYM, ZNF703, dUTPase (DUT), SPHK1, AMDHD1, BCKD-E1beta, SIAHBP1, TR-alpha, Helios, ARGLU1, Galectin-3, DERP6, SMYD2, ZNF501, TCF12, TBL1X, DHX34, GMEB1, HOXA13, ZNF599, IKBZ, UGT8, RNUT1, Thymidylate kinase, HDAC9, PPM1K, TEF-5, MRPS17, STAT5A, KIAA1394, DIAC, APA1, TdIF1, PLA2G4C, HRPT2, TPK1, MMS21, CBP, GPX3, LIPC (HL), IDH1, SLC19A2, SRA1, ZNF771, CHSY1…	5.27464e-05	0.00559111	51	FoxL2, NEP1, ZBTB42, ZNF431, RPS28, CNBP, Thimet oligopeptidase, ZNF600, ZNF536, SRB7, ZNF417, BCL9-2, RFX4, ZNF616, Ubi-L, ZNF623, CPSF2, OBFC1, KIAA1443, ZNF665, RPS20, ZNF141, ZNF71, SERTAD1, NEU3, ONECUT3, ZNF284, ORMDL2, CKBBP2, E2N(UBC13), UCP2, HEXIM1, ZNF471, PDE7A, MIER2, NF-E2 (45 kDa), eIF2B, Uronyl-2-sulfotransferase, ZNF740, IRE1, eIF2B2, DRIL1, PRDM13, Psapl1, RPS19, RPS30, U5-15kD,…	0.726995	0.942184	905	ZNF510, ZNF135, PDE6A, ALDOB, ATP6V1A (70kD), MRPL34, APG16L1, SNAT, UQCRB, FR-alpha, KMO, INO80C, PANK1, RAG1, ZNF260, TDRD6, HOXA10, MTND4, GPX2, ASAH, CYP1B1, PA2G6, RARbeta, CPSM, NCAG1, RNU7, TCF24, ATP13A4, PLA1A, PROX2, S14 protein, RPA3, SPHAR, RecQ5, Thyroglobulin, ATF-3, BRM, PGAM2, SMPD3, LMX1B, ZNF497, P4HA2, TEX15, GSTO1, DHFR, CECR1, NAR4, A130042E20Rik, MTHFD2L, BRUNOL4, RBM21, MYT…
10	cellular component organization	6873	2.64254e-215	3.67577e-212	2.64254e-215	3.67577e-212	4341	KIAA0971, APG3, DNMT3B, RFC4, ZNF703, dUTPase (DUT), TRIO, VDU1, VLDL, PARD6G, Tensin, Protocadherin LKC, TOM20, SCPX, YME1L1, PDK1, Galectin-3, DERP6, Laminin 9, SMYD2, Selenoprotein N, C19orf21, KIAA1043, TBL1X, PRDX3, CNTN1 (F3), H19, TIP30, HOXA13, LTBP3, UGT8, CROCCL1, RNUT1, HDAC9, CCDC100, MRPS17, Plakophilin 3, TSGA14, HAT1, Alpha-actinin 4, HRPT2, MMS21, CBP, MIP-T3, GPX3, LIPC (HL), Gli…	0.305587	0.614404	34	TLK2, FoxL2, NEP1, DNAI1, SLC17A7, RPS28, Dynein, axonemal, intermediate chains, LIPE, RILPL2, SPBC24, RFX4, Ubi-L, OBFC1, TMEM107, TGF-beta 3, Tim22, RPS20, Pen-2, CKBBP2, E2N(UBC13), Ttc7b, TMEM11, NF-E2 (45 kDa), PAHX-AP1, PRDM13, UBE2S, RPS19, RPS30, DNAH7, U5-15kD, gamma-Secretase complex, HDGFRP3, LINGO3, TLR2	0.0102821	0.127702	957	ZNF135, Nectin-4, ALDOB, HAUS7, SLITRK4, MRPL34, RAB39B, APG16L1, Laminin 5, IL-7 receptor, UQCRB, PIGR, BBS5, FOP, Meckelin, NSF, FR-alpha, INO80C, HBGA, NCAM2, C15orf38, RAG1, TMEM39B, VHLL, MTND4, HKLP2, CYP1B1, ZNF207, COL6A3, NCAM1, Telethonin, KIAA0376, ABR, HEPACAM2, Keratin 10, Isca1(Hbld2), FEZ2, LRRTM4, alpha-4/beta-1 integrin, RPA3, RecQ5, CaMK II beta, FGF17, Klotho beta, Caveolin-2, …

## Sheet: Process Networks
Enrichment analysis report
Enrichment by Process Networks					Common				Unique for hcv K9Ac ChIP_TSS_K9AC_logFC				Unique for HCV_mRNA_27_6_2016_mRNA_logFC
#	Networks	Total	pValue	Min FDR	p-value	FDR	In Data	Network Objects from Active Data	p-value	FDR	In Data	Network Objects from Active Data	p-value	FDR	In Data	Network Objects from Active Data
1	Cell cycle_Mitosis	179	5.09215e-28	6.47967e-26	5.09215e-28	6.47967e-26	164	CAPZA, Cyclin B2, Separase, CAPZ beta, SMC1, CAP-G/G2, MACF1, CDC20, HMG20B, Importin (karyopherin)-alpha, DSN1, CRK, CENP-C, HDAC6, CENP-E, MPP6, Dynamin-2, DCTN6, Actin, CDC25, PARD6B, Ubiquitin, Condensin, MAD1 (mitotic checkpoint), Dynein 1, cytoplasmic, heavy chain, Survivin, Alpha-centractin, Karyopherin alpha 2, Tubulin gamma 1, MAPRE3(EB3), Dynactin (p62), Dynactin complex, TOP2, MCAK, Cy…	1	1	0		0.999286	0.999997	13	MAD2a, Aurora-C, HGF, Karyopherin alpha 4, Mitotic cohesin complex, HEC, Tubulin alpha 1A, CHFR, CAS-L, Rad21, SPBC25, CDCA1, XRCC1
2	Cell cycle_G2-M	206	8.15053e-28	6.47967e-26	8.15053e-28	6.47967e-26	184	DNMT3B, Cyclin B2, GRB2, BLM, PLK4 (STK18), CKS2, CAP-G/G2, GTSE1, LZTS1, H-Ras, CDC20, NEDD8, c-Raf-1, p21, Rad51, CDC25, Ubiquitin, Shc, Condensin, p73, Chk1, LATS1, Cyclin A2, CAK complex, CDC34, ESCO1, IGF-1 receptor, SKP2, TOP2, ZAK, Cyclin B1, p58/GTA, c-Myc, PLK1, TCP1-theta, CDC25C, PTCH1, CAP-G, ANAPC11, 14-3-3 zeta/delta, ASPP2, FOXM1, INCENP, ANAPC2, PDGF-A, Myosin II, CDC14a, SOS, p90…	0.0686317	0.672247	3	Nek8, E2N(UBC13), U5-15kD	0.999868	0.999997	14	MAD2a, FANCD2, IGF-2, Histone H1 testis, AP-2A, CDK10, CD2, EGF, HDAC4, PINX1, Chk2, Rad50, ATRIP, IGF-1
3	Proteolysis_Ubiquitin-proteasomal proteolysis	166	9.86026e-21	5.22594e-19	9.86026e-21	5.22594e-19	146	VDU1, SYVN1, SENP3, PSMA4, UBE2H, RAD6, Cul5/Rbx2 E3 ligase, PSMB1, PSMC3, UBCH8, PSMC4, Cul5/Rbx1 E3 ligase, E2I, EDD, SELS, Ubiquitin, Elongin B, UCHL5, Tubulin gamma 1, Syntaxin 5, Itch, MPDZ, CDC34, UBE2A, VCIP135, SMURF, UBE2D1, BAP1, PSMA3, PSMA5, 26S proteasome (19S regulator), Bard1, PSMD9, PSMD6, MDM4, Birc6, RAD23A, KEAP1, c-Cbl, BBAP, SMURF1, SMURF2, PSMC2, PSMD5, PSMA7, SENP2, SAE1, G…	0.178378	0.672247	2	TGT, E2N(UBC13)	0.997616	0.999997	13	HAUS7, UBCH7, UCHL3, SIAH1, USP6, Derlin1, VHL, Parkin, CHFR, PSMA6, NUMB, DTX2, Rnf14 (ARA54)
4	Cell cycle_S phase	149	3.69776e-17	1.46986e-15	3.69776e-17	1.46986e-15	129	RFC4, SG2NA, ORC2L, Cyclin B2, Separase, SMC1, DP1, MCM10, DERPC, DNA polymerase epsilon, ChAF1 subunit B, POLA1, p21, PDS5, Rad51, DNA polymerase alpha/primase, Ubiquitin, TOP3A, BRIP1, Cyclin A2, ORC4L, DDX11, CHTF18, ESCO1, TOP2, ZAK, Cyclin B1, POLE3 (YBL1), RFC complex, CAF-1, PLK1, DCC1, CDC45L, MCM3, E2F1/DP1 complex, CDC7, POLE4, ORC1L, MCM4, SUGT1, CDC14a, ASK (Dbf4), POLE2, Anaphase-pro…	0.502331	0.672247	1	TLK2	0.962541	0.999997	15	RPA3, FEN1, PP2A cat (alpha), Histone H1 testis, Mitotic cohesin complex, Nucleostemin, Cyclin B3, MCM8, WRN, ERK3, POLD reg (p68), Nibrin, Rad21, Chk2, TLK1
5	Cell cycle_Core	115	1.33039e-14	4.23065e-13	1.33039e-14	4.23065e-13	101	p14ARF, ORC2L, Cyclin B2, Separase, DP1, CKS2, MCM10, CDC20, DNA polymerase epsilon, CENP-E, p21, DNA polymerase alpha/primase, E2F3, Condensin, MAD1 (mitotic checkpoint), E2F3/DP1 complex, E2F2, Survivin, CDK4, ORC4L, p19, CAK complex, TOP2, Cyclin B1, p27KIP1, PLK1, CDC45L, MCM3, E2F1/DP1 complex, CDC7, ZW10, ORC1L, CDC25C, CENP-A, CAP-G, MCM4, INCENP, Rod, CDC14a, ASK (Dbf4), Anaphase-promotin…	0.415666	0.672247	1	Nek8	0.928123	0.999997	12	RPA3, MAD2a, FEN1, Aurora-C, E2F5/DP1 complex, Mitotic cohesin complex, Cyclin B3, HEC, E2F5, MCM8, WRN, p107
6	Signal transduction_NOTCH signaling	235	4.35336e-14	1.09844e-12	4.35336e-14	1.09844e-12	183	TCF12, NUMBL, DVL-3, RHEB2, GRB2, c-Fos, CD44, Neuregulin 1, FBXW7, SMRT, H-Ras, DLL3, GATA-4, c-Raf-1, p21, SMAD2, Dsh, NOTCH2 (2ICD), Ubiquitin, Shc, p73, PI3K reg class IA (p85), PAX5, FZD2, NEURL2, SOS2, MAP2, WNT11, MPDZ, SKP2, ERK2 (MAPK1), c-Src, p27KIP1, c-Myc, WNT5B, DVL-2, SHARP (SPEN), ARNT, HEY1, TGF-beta 2, JAK2, PI3K cat class IA, NF-kB1 (p105), NF-kB1 (p50), HES7, HIF1A, SMURF2, MA…	0.296608	0.672247	2	TGF-beta 3, gamma-Secretase complex	0.998575	0.999997	20	BRM, eIF4E, MAML2, DAB2, Carbonic anhydrase IX, Amphiregulin, HDAC2, CD4, Lck, WNT16, SFRP4, EGF, Jagged2, p63, MEK6(MAP2K6), RBBP8 (CtIP), PDGF-D, NUMB, WNT5A, FHL1 (SLIM1)
7	Cell cycle_G1-S Growth factor regulation	195	5.34943e-14	1.09844e-12	5.34943e-14	1.09844e-12	156	SPHK1, LTBP3, p14ARF, GRB2, c-Fos, NDPK complex, DP1, PI3K cat class IA (p110-beta), IRS-1, H-Ras, NF-kB p50/c-Rel, c-Raf-1, IKK (cat), FRS2, G-protein alpha-q/11, p21, PKC-epsilon, FGF9, MKK4/7, PLC-beta1, FGFR1, STAT1, NF-kB p50/p50, Shc, PI3K reg class IA (p85), NF-kB2 (p100), Activin beta A, PI3K reg class IA (p85-beta), SOS2, Thrombin, CDK4, Cyclin A2, IKK-alpha, p19, NFKBIE, Tob1, NF-kB p52…	0.599992	0.672247	1	TGF-beta 3	0.997948	0.999997	16	FGF1, PP2A cat (alpha), IGF-2, HGF, PKC-beta, TL1A(TNFSF15), PPP2R2B, MAD, EGF, p107, Inhibin alpha subunit, PI3K reg class IA (p55-gamma), MATK, SKIP (Ski-interacting protein), Inhibin, IGF-1
8	Transcription_mRNA processing	160	5.59821e-14	1.09844e-12	5.59821e-14	1.09844e-12	132	SIAHBP1, CPSF5, SFRS7 (9G8), snRNP-F, CSTF1, RENT3B, SRp55, SPF30, SART1, CBP80, SFRS4, SF3B1, SNRPA, NIPP-1, NXT2, U2 snRNP A1, CPSF1, U2AF35, hnRNP R, U2 snRNP B2, PRPF18, LSM6, UPF3A, SF3B5, SFRS3, DDX17, FIP1L1, PSF, RNASE4, SF3A2, hnRNP A1, SNRPB (Sm-B), Clp1, SRRM1, hnRNP H1, snRNP-E, DDX23, RNMT, SAD1 (USP39), LSM1, Prp8, CAPER, LSM5, DDX20, U1-70K, NXF1, SNRPD1 (SMD1), hnRNP A2, SFRS9, U2…	0.168452	0.672247	2	CPSF2, U5-15kD	0.946982	0.999997	17	CRN, Gemin4, DDX5, SFRS12, LSm7, SF3b, Tex1, CSTF3, TNRC4, Poly(A) polymerase, Gemin6, SMN1, p54, SKIP (Ski-interacting protein), FUSIP1, NHP2-like protein 1, SF3B2
9	Cell cycle_G1-S	163	6.21758e-14	1.09844e-12	6.21758e-14	1.09844e-12	134	p14ARF, CDK5, CNOT7, BLM, DP1, CKS2, FBXW7, NEDD8, NOL1, Importin (karyopherin)-alpha, Prohibitin, Axin1, HDAC3, FRK, p21, Rad51, CDK inhibitor 3, Ubiquitin, ING1, Chk1, CDK4, Cyclin A2, Karyopherin alpha 2, p19, NFKBIE, CAK complex, CDC34, UBE1C, SKP2, Fe65, 26S proteasome (19S regulator), p27KIP1, c-Myc, PLK1, Axin, E2F1/DP1 complex, GAK, ANAPC11, 14-3-3 zeta/delta, ANAPC2, CDC14a, Karyopherin …	0.534271	0.672247	1	SERTAD1	0.996883	0.999997	13	MTCP1(p13), FANCD2, TYSY, Karyopherin alpha 4, CDK10, CRCM, APP-BP1, p107, Nibrin, Chk2, JAB1, BCAT1, ATRIP
10	Cytoskeleton_Spindle microtubules	109	2.41616e-13	3.84169e-12	2.41616e-13	3.84169e-12	95	KIF4A, Cyclin B2, Separase, SMC1, CKS2, GTSE1, CDC20, HMG20B, Importin (karyopherin)-alpha, CENP-C, CENP-E, Condensin, MAD1 (mitotic checkpoint), UNC84B, Dynein 1, cytoplasmic, heavy chain, Karyopherin alpha 2, Tubulin gamma 1, 4.1N, MAP2, Dynactin complex, MCAK, Cyclin B1, PLK1, Ran, Tubulin beta, KATNA1, CENP-B, NUMA1, HZwint-1, HOOK1, ZW10, CENP-A, INCENP, ANAPC2, Rod, CDC14a, Anaphase-promoti…	1	1	0		0.968002	0.999997	10	MAD2a, Aurora-C, TUBGCP2, Mitotic cohesin complex, HEC, Tubulin alpha 1A, Meiotic cohesin complex, HOOK2, MID1, TUBGCP4 (76P)

## Sheet: Diseases (by Biomarkers)
Enrichment analysis report
Enrichment by Diseases (by Biomarkers)					Common				Unique for hcv K9Ac ChIP_TSS_K9AC_logFC				Unique for HCV_mRNA_27_6_2016_mRNA_logFC
#	Diseases	Total	pValue	Min FDR	p-value	FDR	In Data	Network Objects from Active Data	p-value	FDR	In Data	Network Objects from Active Data	p-value	FDR	In Data	Network Objects from Active Data
1	Neoplasms by Site	22375	3.31113e-166	9.29765e-163	3.31113e-166	9.29765e-163	10863	KIAA0971, APG3, PQLC3, ZNF668, DNMT3B, ZNF695, KBTBD2, SDHA, Tmem205, RFC4, SLC17A9, SIAT4A, ANKRD32, FAM89B, CRYM, ALK-4, SLC31A1, ZNF703, CRHSP-24, Cerebellin 3, dUTPase (DUT), TRIO, VDU1, SPHK1, QSER1, Hinderin, VLDL, AMDHD1, BCKD-E1beta, PARD6G, Tensin, SIAHBP1, Protocadherin LKC, TRIM46, TOM20, SCPX, RKHD3, PYROXD2, TR-alpha, SLAC2-B, Helios, RAB6IP1, YME1L1, COQ10A, PDK1, SSBP4, SLC2A6, ARG…	0.123225	0.77621	105	C15orf59, KCNK6, miR-423-5p, TLK2, MPPED2, Elastase 3B, NAT12, PMX2, FoxL2, C9orf53, TRPM5, LONRF2, HRK, DNAI1, ZNF431, Nop25, SLC17A7, HSD17B1, RPS28, Dynein, axonemal, intermediate chains, LIPE, ZDHHC24, CNBP, RILPL2, Thimet oligopeptidase, ZNF804B, ZNF600, ZNF536, ARD1B, SPBC24, ZNF417, miR-423-3p, ST2L, TGT, BCL9-2, RFX4, ZNF616, Ubi-L, Layilin, ZNF623, RFXDC2, TMEM38A, PAMCI, CPSF2, C5orf47,…	2.2126e-27	5.01597e-24	3072	ZNF510, TULP4, nAChR alpha-10, ZNF135, Pappalysin-2, Nectin-4, MrgX2, GLYATL1, PDE6A, ALDOB, HAUS7, SLITRK4, ATP6V1A (70kD), TLR1, MRPL34, PLAC9, FLJ36046, C9orf153, GPR62, RAB39B, APG16L1, CCD37, SNAT, Laminin 5, IL-7 receptor, TNF-R2, FKBP9L, UQCRB, PIGR, BBS5, OFCC1, FOP, Meckelin, NSF, FR-alpha, KMO, CYP2C8, C3orf20, GnRH1, INO80C, Septin 14, HBGA, RFPL3, NCAM2, STIM1, CASP1(p20), CNTNAP4, TM…
2	Neoplasms	22918	1.85004e-157	2.59745e-154	1.85004e-157	2.59745e-154	11021	KIAA0971, APG3, PQLC3, ZNF668, DNMT3B, ZNF695, KBTBD2, SDHA, Tmem205, RFC4, SLC17A9, SIAT4A, ANKRD32, FAM89B, CRYM, ALK-4, SLC31A1, ZNF703, CRHSP-24, Cerebellin 3, dUTPase (DUT), TRIO, VDU1, SPHK1, QSER1, Hinderin, VLDL, AMDHD1, BCKD-E1beta, PARD6G, Tensin, SIAHBP1, Protocadherin LKC, TRIM46, TOM20, SCPX, RKHD3, PYROXD2, TR-alpha, SLAC2-B, Helios, RAB6IP1, YME1L1, COQ10A, PDK1, SSBP4, SLC2A6, ARG…	0.375701	0.838658	105	C15orf59, KCNK6, miR-423-5p, TLK2, MPPED2, Elastase 3B, NAT12, PMX2, FoxL2, C9orf53, TRPM5, LONRF2, HRK, DNAI1, ZNF431, Nop25, SLC17A7, HSD17B1, RPS28, Dynein, axonemal, intermediate chains, LIPE, ZDHHC24, CNBP, RILPL2, Thimet oligopeptidase, ZNF804B, ZNF600, ZNF536, ARD1B, SPBC24, ZNF417, miR-423-3p, ST2L, TGT, BCL9-2, RFX4, ZNF616, Ubi-L, Layilin, ZNF623, RFXDC2, TMEM38A, PAMCI, CPSF2, C5orf47,…	2.00413e-23	5.67919e-21	3113	ZNF510, TULP4, nAChR alpha-10, ZNF135, Pappalysin-2, Nectin-4, MrgX2, GLYATL1, PDE6A, ALDOB, HAUS7, SLITRK4, ATP6V1A (70kD), TLR1, MRPL34, PLAC9, FLJ36046, C9orf153, GPR62, RAB39B, APG16L1, CCD37, SNAT, Laminin 5, IL-7 receptor, TNF-R2, FKBP9L, UQCRB, PIGR, BBS5, OFCC1, FOP, Meckelin, NSF, FR-alpha, KMO, CYP2C8, C3orf20, GnRH1, INO80C, Septin 14, HBGA, RFPL3, NCAM2, STIM1, CASP1(p20), CNTNAP4, TM…
3	Respiratory Tract Neoplasms	18374	4.32125e-149	4.04469e-146	4.32125e-149	4.04469e-146	9310	KIAA0971, APG3, PQLC3, ZNF668, DNMT3B, KBTBD2, SDHA, Tmem205, RFC4, SLC17A9, CRYM, ALK-4, SLC31A1, ZNF703, CRHSP-24, Cerebellin 3, TRIO, VDU1, SPHK1, QSER1, Hinderin, VLDL, AMDHD1, BCKD-E1beta, PARD6G, Tensin, SIAHBP1, Protocadherin LKC, TRIM46, TOM20, SCPX, RKHD3, PYROXD2, TR-alpha, SLAC2-B, Helios, RAB6IP1, YME1L1, COQ10A, PDK1, SLC2A6, ARGLU1, Galectin-3, AFAP1L1, Laminin 9, SMYD2, ST7, Seleno…	0.297087	0.781865	86	C15orf59, KCNK6, TLK2, MPPED2, Elastase 3B, NAT12, PMX2, C9orf53, TRPM5, LONRF2, DNAI1, ZNF431, Nop25, SLC17A7, HSD17B1, Dynein, axonemal, intermediate chains, LIPE, CNBP, Thimet oligopeptidase, ZNF804B, ZNF600, ZNF536, ARD1B, SPBC24, ZNF417, ST2L, TGT, BCL9-2, RFX4, ZNF616, Ubi-L, Layilin, ZNF623, TMEM38A, PAMCI, CPSF2, OBFC1, FLJ14451, GPR142, TMEM107, TGF-beta 3, ECEL1, ZNF665, Pen-2, ZNF141, …	6.82313e-25	3.86701e-22	2628	ZNF510, TULP4, nAChR alpha-10, ZNF135, Pappalysin-2, Nectin-4, MrgX2, GLYATL1, PDE6A, ALDOB, HAUS7, SLITRK4, ATP6V1A (70kD), TLR1, FLJ36046, C9orf153, GPR62, RAB39B, APG16L1, CCD37, SNAT, Laminin 5, IL-7 receptor, TNF-R2, UQCRB, PIGR, BBS5, OFCC1, FOP, Meckelin, NSF, FR-alpha, KMO, CYP2C8, C3orf20, INO80C, Septin 14, HBGA, NCAM2, STIM1, CASP1(p20), CNTNAP4, TMEM140, FDX1L, C15orf38, MLANA, CRISP-…
4	Lung Neoplasms	18271	1.66656e-147	1.16993e-144	1.66656e-147	1.16993e-144	9263	KIAA0971, APG3, PQLC3, ZNF668, DNMT3B, KBTBD2, SDHA, Tmem205, RFC4, SLC17A9, CRYM, ALK-4, SLC31A1, ZNF703, CRHSP-24, Cerebellin 3, TRIO, VDU1, SPHK1, QSER1, Hinderin, VLDL, AMDHD1, BCKD-E1beta, PARD6G, Tensin, SIAHBP1, Protocadherin LKC, TRIM46, TOM20, SCPX, RKHD3, PYROXD2, TR-alpha, SLAC2-B, Helios, RAB6IP1, YME1L1, COQ10A, PDK1, SLC2A6, ARGLU1, Galectin-3, AFAP1L1, Laminin 9, SMYD2, ST7, Seleno…	0.263164	0.779699	86	C15orf59, KCNK6, TLK2, MPPED2, Elastase 3B, NAT12, PMX2, C9orf53, TRPM5, LONRF2, DNAI1, ZNF431, Nop25, SLC17A7, HSD17B1, Dynein, axonemal, intermediate chains, LIPE, CNBP, Thimet oligopeptidase, ZNF804B, ZNF600, ZNF536, ARD1B, SPBC24, ZNF417, ST2L, TGT, BCL9-2, RFX4, ZNF616, Ubi-L, Layilin, ZNF623, TMEM38A, PAMCI, CPSF2, OBFC1, FLJ14451, GPR142, TMEM107, TGF-beta 3, ECEL1, ZNF665, Pen-2, ZNF141, …	4.10568e-25	3.86701e-22	2617	ZNF510, TULP4, nAChR alpha-10, ZNF135, Pappalysin-2, Nectin-4, MrgX2, GLYATL1, PDE6A, ALDOB, HAUS7, SLITRK4, ATP6V1A (70kD), TLR1, FLJ36046, C9orf153, RAB39B, APG16L1, CCD37, SNAT, Laminin 5, IL-7 receptor, TNF-R2, UQCRB, PIGR, BBS5, OFCC1, FOP, Meckelin, NSF, FR-alpha, KMO, CYP2C8, C3orf20, INO80C, Septin 14, HBGA, NCAM2, STIM1, CASP1(p20), CNTNAP4, TMEM140, FDX1L, C15orf38, MLANA, CRISP-3, RAG1…
5	Thoracic Neoplasms	18284	1.0675e-145	5.9951e-143	1.0675e-145	5.9951e-143	9263	KIAA0971, APG3, PQLC3, ZNF668, DNMT3B, KBTBD2, SDHA, Tmem205, RFC4, SLC17A9, CRYM, ALK-4, SLC31A1, ZNF703, CRHSP-24, Cerebellin 3, TRIO, VDU1, SPHK1, QSER1, Hinderin, VLDL, AMDHD1, BCKD-E1beta, PARD6G, Tensin, SIAHBP1, Protocadherin LKC, TRIM46, TOM20, SCPX, RKHD3, PYROXD2, TR-alpha, SLAC2-B, Helios, RAB6IP1, YME1L1, COQ10A, PDK1, SLC2A6, ARGLU1, Galectin-3, AFAP1L1, Laminin 9, SMYD2, ST7, Seleno…	0.267321	0.779699	86	C15orf59, KCNK6, TLK2, MPPED2, Elastase 3B, NAT12, PMX2, C9orf53, TRPM5, LONRF2, DNAI1, ZNF431, Nop25, SLC17A7, HSD17B1, Dynein, axonemal, intermediate chains, LIPE, CNBP, Thimet oligopeptidase, ZNF804B, ZNF600, ZNF536, ARD1B, SPBC24, ZNF417, ST2L, TGT, BCL9-2, RFX4, ZNF616, Ubi-L, Layilin, ZNF623, TMEM38A, PAMCI, CPSF2, OBFC1, FLJ14451, GPR142, TMEM107, TGF-beta 3, ECEL1, ZNF665, Pen-2, ZNF141, …	5.27732e-25	3.86701e-22	2618	ZNF510, TULP4, nAChR alpha-10, ZNF135, Pappalysin-2, Nectin-4, MrgX2, GLYATL1, PDE6A, ALDOB, HAUS7, SLITRK4, ATP6V1A (70kD), TLR1, FLJ36046, C9orf153, RAB39B, APG16L1, CCD37, SNAT, Laminin 5, IL-7 receptor, TNF-R2, UQCRB, PIGR, BBS5, OFCC1, FOP, Meckelin, NSF, FR-alpha, KMO, CYP2C8, C3orf20, INO80C, Septin 14, HBGA, NCAM2, STIM1, CASP1(p20), CNTNAP4, TMEM140, FDX1L, C15orf38, MLANA, CRISP-3, RAG1…
6	Urogenital Neoplasms	18529	1.11121e-127	5.20046e-125	1.11121e-127	5.20046e-125	9309	KIAA0971, APG3, PQLC3, ZNF668, DNMT3B, ZNF695, KBTBD2, SDHA, RFC4, SLC17A9, ANKRD32, FAM89B, CRYM, ALK-4, SLC31A1, ZNF703, TRIO, VDU1, SPHK1, QSER1, Hinderin, VLDL, AMDHD1, BCKD-E1beta, Tensin, Protocadherin LKC, TRIM46, TOM20, SCPX, RKHD3, PYROXD2, TR-alpha, SLAC2-B, Helios, RAB6IP1, YME1L1, COQ10A, PDK1, SSBP4, SLC2A6, Galectin-3, AFAP1L1, Laminin 9, SMYD2, ST7, miR-135a-5p, Selenoprotein N, C1…	0.272659	0.779699	87	C15orf59, KCNK6, miR-423-5p, TLK2, Elastase 3B, NAT12, FoxL2, C9orf53, TRPM5, LONRF2, HRK, DNAI1, ZNF431, Nop25, SLC17A7, HSD17B1, Dynein, axonemal, intermediate chains, LIPE, ZDHHC24, CNBP, RILPL2, Thimet oligopeptidase, ZNF804B, ZNF600, ZNF536, ARD1B, miR-423-3p, ST2L, TGT, BCL9-2, RFX4, ZNF616, Ubi-L, Layilin, ZNF623, TMEM38A, PAMCI, CPSF2, C5orf47, FLJ14451, GPR142, TMEM107, TGF-beta 3, Tim22…	5.35659e-19	7.58962e-17	2616	ZNF510, TULP4, nAChR alpha-10, ZNF135, Nectin-4, MrgX2, GLYATL1, PDE6A, ALDOB, HAUS7, SLITRK4, ATP6V1A (70kD), TLR1, MRPL34, PLAC9, FLJ36046, GPR62, RAB39B, APG16L1, CCD37, Laminin 5, IL-7 receptor, TNF-R2, UQCRB, PIGR, BBS5, OFCC1, FOP, Meckelin, NSF, FR-alpha, KMO, CYP2C8, C3orf20, GnRH1, INO80C, HBGA, RFPL3, NCAM2, STIM1, CASP1(p20), CNTNAP4, TMEM140, FDX1L, C15orf38, MLANA, CRISP-3, RAG1, TME…
7	Respiratory Tract Diseases	18871	5.52416e-123	2.21598e-120	5.52416e-123	2.21598e-120	9435	KIAA0971, APG3, PQLC3, ZNF668, DNMT3B, KBTBD2, SDHA, Tmem205, RFC4, SLC17A9, CRYM, ALK-4, SLC31A1, ZNF703, CRHSP-24, Cerebellin 3, TRIO, VDU1, SPHK1, QSER1, Hinderin, VLDL, AMDHD1, BCKD-E1beta, PARD6G, Tensin, SIAHBP1, Protocadherin LKC, TRIM46, TOM20, SCPX, RKHD3, PYROXD2, TR-alpha, SLAC2-B, Helios, RAB6IP1, YME1L1, COQ10A, PDK1, SLC2A6, ARGLU1, Galectin-3, AFAP1L1, Laminin 9, SMYD2, ST7, Seleno…	0.235105	0.779699	89	C15orf59, KCNK6, miR-423-5p, TLK2, MPPED2, Elastase 3B, NAT12, PMX2, C9orf53, TRPM5, LONRF2, DNAI1, ZNF431, Nop25, SLC17A7, HSD17B1, Dynein, axonemal, intermediate chains, LIPE, CNBP, Thimet oligopeptidase, ZNF804B, ZNF600, ZNF536, ARD1B, SPBC24, ZNF417, miR-423-3p, ST2L, TGT, BCL9-2, RFX4, ZNF616, Ubi-L, Layilin, ZNF623, TMEM38A, PAMCI, CPSF2, OBFC1, FLJ14451, GPR142, TMEM107, TGF-beta 3, ECEL1,…	1.64594e-24	6.2189e-22	2684	ZNF510, TULP4, nAChR alpha-10, ZNF135, Pappalysin-2, Nectin-4, MrgX2, GLYATL1, PDE6A, ALDOB, HAUS7, SLITRK4, ATP6V1A (70kD), TLR1, FLJ36046, C9orf153, GPR62, RAB39B, APG16L1, CCD37, SNAT, Laminin 5, IL-7 receptor, TNF-R2, UQCRB, PIGR, BBS5, OFCC1, SRGAP2(WRP), FOP, Meckelin, NSF, FR-alpha, KMO, CYP2C8, C3orf20, INO80C, Septin 14, HBGA, NCAM2, STIM1, CASP1(p20), CNTNAP4, TMEM140, FDX1L, C15orf38, …
8	Lung Diseases	18733	2.91871e-122	1.02447e-119	2.91871e-122	1.02447e-119	9376	KIAA0971, APG3, PQLC3, ZNF668, DNMT3B, KBTBD2, SDHA, Tmem205, RFC4, SLC17A9, CRYM, ALK-4, SLC31A1, ZNF703, CRHSP-24, Cerebellin 3, TRIO, VDU1, SPHK1, QSER1, Hinderin, VLDL, AMDHD1, BCKD-E1beta, PARD6G, Tensin, SIAHBP1, Protocadherin LKC, TRIM46, TOM20, SCPX, RKHD3, PYROXD2, TR-alpha, SLAC2-B, Helios, RAB6IP1, YME1L1, COQ10A, PDK1, SLC2A6, ARGLU1, Galectin-3, AFAP1L1, Laminin 9, SMYD2, ST7, Seleno…	0.194853	0.77621	89	C15orf59, KCNK6, miR-423-5p, TLK2, MPPED2, Elastase 3B, NAT12, PMX2, C9orf53, TRPM5, LONRF2, DNAI1, ZNF431, Nop25, SLC17A7, HSD17B1, Dynein, axonemal, intermediate chains, LIPE, CNBP, Thimet oligopeptidase, ZNF804B, ZNF600, ZNF536, ARD1B, SPBC24, ZNF417, miR-423-3p, ST2L, TGT, BCL9-2, RFX4, ZNF616, Ubi-L, Layilin, ZNF623, TMEM38A, PAMCI, CPSF2, OBFC1, FLJ14451, GPR142, TMEM107, TGF-beta 3, ECEL1,…	1.01352e-24	4.59532e-22	2669	ZNF510, TULP4, nAChR alpha-10, ZNF135, Pappalysin-2, Nectin-4, MrgX2, GLYATL1, PDE6A, ALDOB, HAUS7, SLITRK4, ATP6V1A (70kD), TLR1, FLJ36046, C9orf153, RAB39B, APG16L1, CCD37, SNAT, Laminin 5, IL-7 receptor, TNF-R2, UQCRB, PIGR, BBS5, OFCC1, SRGAP2(WRP), FOP, Meckelin, NSF, FR-alpha, KMO, CYP2C8, C3orf20, INO80C, Septin 14, HBGA, NCAM2, STIM1, CASP1(p20), CNTNAP4, TMEM140, FDX1L, C15orf38, MLANA, …
9	Uterine Neoplasms	12526	2.74964e-114	8.57889e-112	2.74964e-114	8.57889e-112	6637	DNMT3B, KBTBD2, SDHA, SLC17A9, ALK-4, ZNF703, TRIO, VDU1, QSER1, Hinderin, VLDL, AMDHD1, BCKD-E1beta, Tensin, Protocadherin LKC, SCPX, PYROXD2, SLAC2-B, Helios, RAB6IP1, YME1L1, COQ10A, SSBP4, SLC2A6, Galectin-3, AFAP1L1, Laminin 9, SMYD2, C19orf21, URB1, ZNF501, TBL1X, CCDC128, DHX34, CNTN1 (F3), MetAP-2, Rhotekin, Galpha(q)-specific Class A Orphan/other GPCRs, HOXA13, ZNF599, LTBP3, IKBZ, UBAP2…	0.358329	0.824927	59	C15orf59, KCNK6, NAT12, C9orf53, TRPM5, LONRF2, DNAI1, ZNF431, Nop25, SLC17A7, HSD17B1, Dynein, axonemal, intermediate chains, LIPE, CNBP, RILPL2, Thimet oligopeptidase, ZNF804B, ZNF600, ZNF536, ARD1B, TGT, BCL9-2, RFX4, ZNF616, Layilin, ZNF623, TMEM38A, PAMCI, CPSF2, FLJ14451, GPR142, TGF-beta 3, Tim22, ECEL1, ZNF665, ZNF71, Nek8, SERTAD1, SSTR2, E2N(UBC13), ZNF471, Ttc7b, TMEM11, MIER2, eIF2B, …	1.43035e-16	1.15807e-14	1852	TULP4, nAChR alpha-10, ZNF135, GLYATL1, PDE6A, HAUS7, SLITRK4, ATP6V1A (70kD), TLR1, MRPL34, GPR62, RAB39B, APG16L1, CCD37, Laminin 5, IL-7 receptor, PIGR, BBS5, OFCC1, Meckelin, FR-alpha, KMO, CYP2C8, C3orf20, GnRH1, INO80C, RFPL3, NCAM2, STIM1, CNTNAP4, FDX1L, C15orf38, CRISP-3, RAG1, FLJ25390, HOXA10, TIGIT, BNIPL, VHLL, IL-1 alpha, SNORA41, MUPP1, HKLP2, ALPK3, CYP1B1, RTL1, COL6A3, ACAP1(CEN…
10	Female Urogenital Diseases	17264	3.06077e-114	8.59465e-112	3.06077e-114	8.59465e-112	8733	KIAA0971, APG3, PQLC3, ZNF668, DNMT3B, KBTBD2, SDHA, RFC4, SLC17A9, FAM89B, ALK-4, ZNF703, TRIO, VDU1, QSER1, Hinderin, VLDL, AMDHD1, BCKD-E1beta, Tensin, Protocadherin LKC, TRIM46, SCPX, RKHD3, PYROXD2, TR-alpha, SLAC2-B, Helios, RAB6IP1, YME1L1, COQ10A, SSBP4, SLC2A6, Galectin-3, AFAP1L1, Laminin 9, SMYD2, ST7, miR-135a-5p, Selenoprotein N, C19orf21, URB1, ZNF501, TBL1X, CCDC128, DHX34, CNTN1 (…	0.234857	0.779699	82	C15orf59, KCNK6, miR-423-5p, TLK2, Elastase 3B, NAT12, FoxL2, C9orf53, TRPM5, LONRF2, DNAI1, ZNF431, Nop25, SLC17A7, HSD17B1, Dynein, axonemal, intermediate chains, LIPE, CNBP, RILPL2, Thimet oligopeptidase, ZNF804B, ZNF600, ZNF536, ARD1B, miR-423-3p, ST2L, TGT, BCL9-2, RFX4, ZNF616, Ubi-L, Layilin, ZNF623, TMEM38A, PAMCI, CPSF2, FLJ14451, GPR142, TMEM107, TGF-beta 3, Tim22, ECEL1, ZNF665, Pen-2,…	2.45648e-17	2.53129e-15	2454	ZNF510, TULP4, nAChR alpha-10, ZNF135, Nectin-4, MrgX2, GLYATL1, PDE6A, ALDOB, HAUS7, SLITRK4, ATP6V1A (70kD), TLR1, MRPL34, PLAC9, FLJ36046, GPR62, RAB39B, APG16L1, CCD37, Laminin 5, IL-7 receptor, TNF-R2, UQCRB, PIGR, BBS5, OFCC1, FOP, Meckelin, NSF, FR-alpha, KMO, CYP2C8, C3orf20, GnRH1, INO80C, HBGA, RFPL3, NCAM2, STIM1, CNTNAP4, TMEM140, FDX1L, C15orf38, MLANA, CRISP-3, RAG1, FLJ25390, ZNF26…

## Sheet: Info
Info
General
Date	2016-07-21
Server	portal.genego.com
Version	6.27.68571
Name	QFAB - Izhak Haviv
Login	qfab28
Workflow Settings
Type	Compare Experiments
Signals	both
Active Data
Name	Type	Size		Threshold	0
HCV_mRNA_27_6_2016_mRNA_logFC	General	18616		P-value	1
hcv K9Ac ChIP_TSS_K9AC_logFC	General	12912
