# Supplementary material for: Hepatitis C virus leaves an epigenetic signature post cure of infection by direct-acting antivirals
Source: PLOS journal article supplement (doi:10.1371/journal.pgen.1008181), 2019-06-19

# Supplementary Figure 8

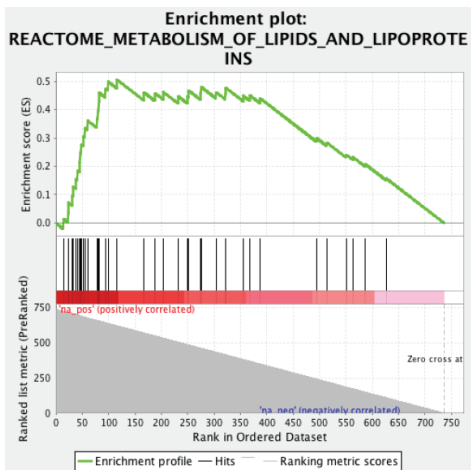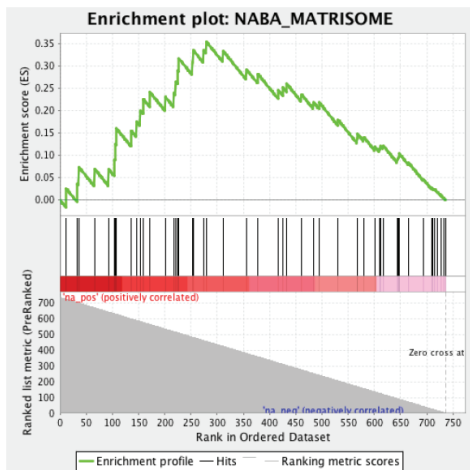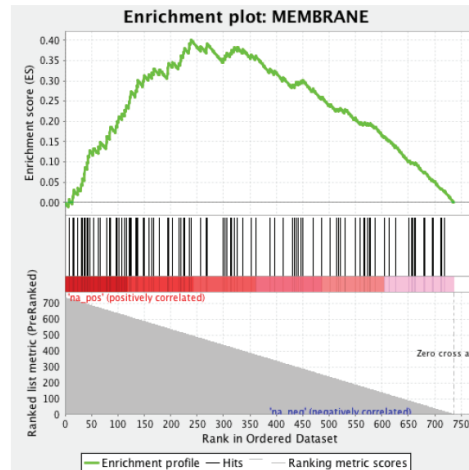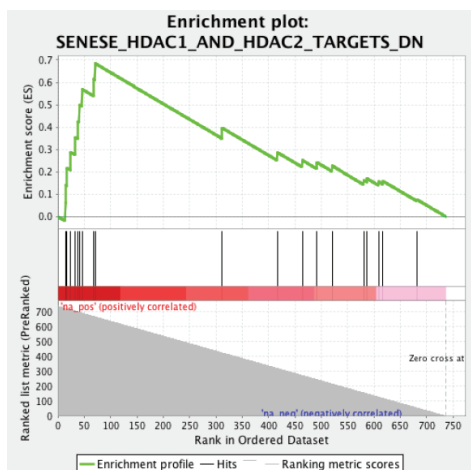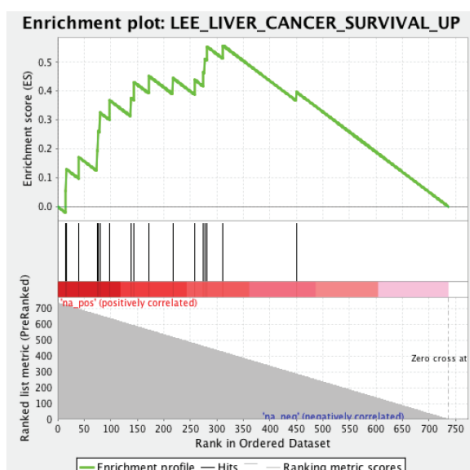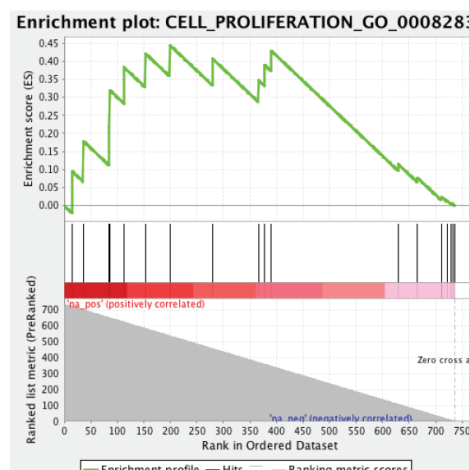

Supplement: S8 (10.1371/journal.pgen.1008181.s008) [file journal.pgen.1008181.s008]
